# Supplementary material for: Dual-recognition colorimetric sensing of thrombin based on surface-imprinted aptamer–Fe3O4
Source: Royal Society of Chemistry journal article supplement (doi:10.1039/d1tb00565k), 2021-01-01
Supplement: d1tb00565k1.pdf [file d1tb00565k1.pdf]

## Electronic Supplementary Information

### Dual recognition colorimetric sensing of thrombin based on surface imprinted aptamer-Fe<sub>3</sub>O<sub>4</sub>

Mingmei Shen, Yuanyuan Wang, Xianwen Kan\*

College of Chemistry and Materials Science, Anhui Normal University, Wuhu 241000, P.R. China; The Key Laboratory of Functional Molecular Solids, Ministry of Education; Anhui Laboratory of Molecule-Based Materials, Anhui Key Laboratory of Chemo-Biosensing.

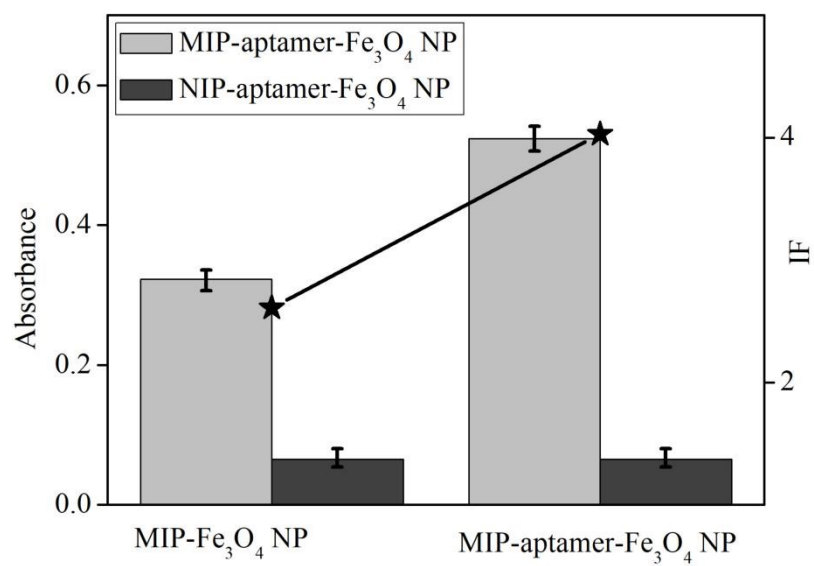

**Figure S1** The UV-vis absorbance intensity change at 652 nm of MIP-Fe<sub>3</sub>O<sub>4</sub>NP and MIP-Aptamer-Fe<sub>3</sub>O<sub>4</sub>NP in the presence of thrombin. IF ( $IF = \Delta A_{MIP} / \Delta A_{NIP}$ ) of MIP-Fe<sub>3</sub>O<sub>4</sub>NP and MIP-aptamer-Fe<sub>3</sub>O<sub>4</sub>NP.

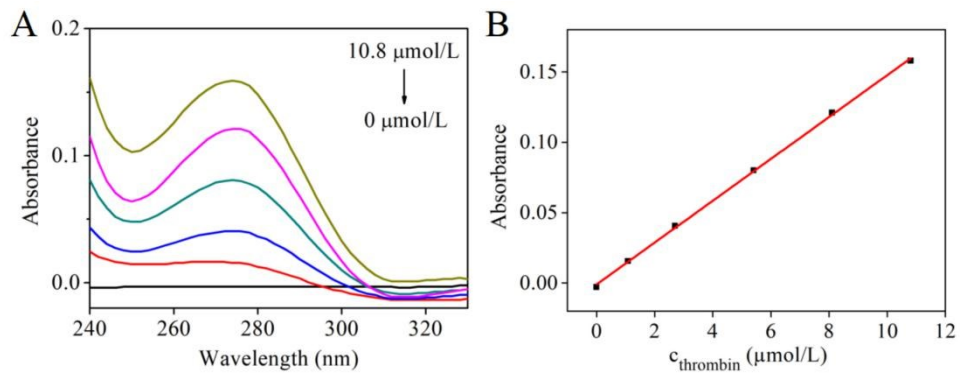

**Figure S2** (A) UV-vis absorption spectra of different concentrations of thrombin. (B) Linear calibration plot between the absorbance intensity and concentration of thrombin.

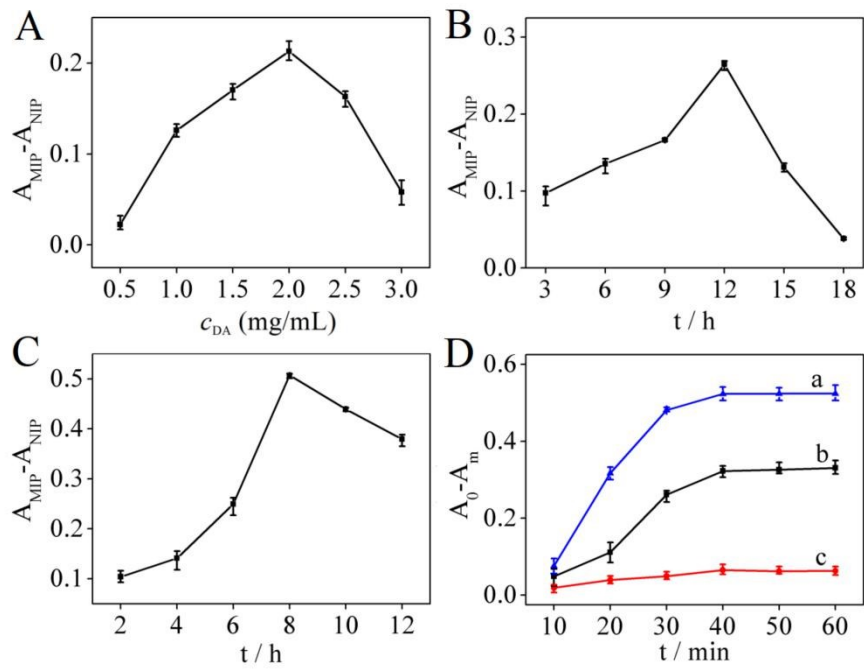

**Figure S3** The optimized conditions of (A) the concentration of DA, (B) polymerization time of polymerization, (C) extraction time for MIP-aptamer-Fe<sub>3</sub>O<sub>4</sub>NP preparation, and (D) rebinding adsorption time of (a) MIP-aptamer-Fe<sub>3</sub>O<sub>4</sub>NP, (b) MIP-Fe<sub>3</sub>O<sub>4</sub>NP, (c) NIP-aptamer-Fe<sub>3</sub>O<sub>4</sub>NP for thrombin.

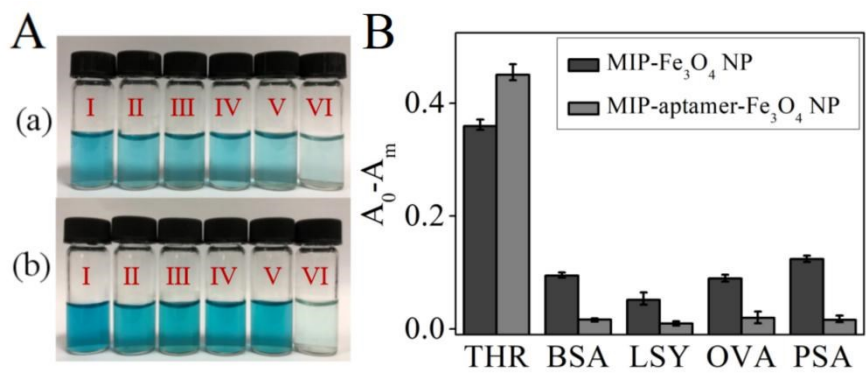

**Figure S4** (A) The photograph images of the supernate of MIP-Fe<sub>3</sub>O<sub>4</sub> NP (a) and MIP-aptamer-Fe<sub>3</sub>O<sub>4</sub> NP (b) for the detection of blank (I), BSA(II), LSY(III), OVA(IV), PSA (V), and thrombin (VI). (B) Histogram of the responses ( $A_0 - A_m$ ) of ox-TMB in the presence of MIP-Fe<sub>3</sub>O<sub>4</sub> NP and MIP-aptamer-Fe<sub>3</sub>O<sub>4</sub> NP for the detection of thrombin, BSA, LSY, OVA, and PSA.

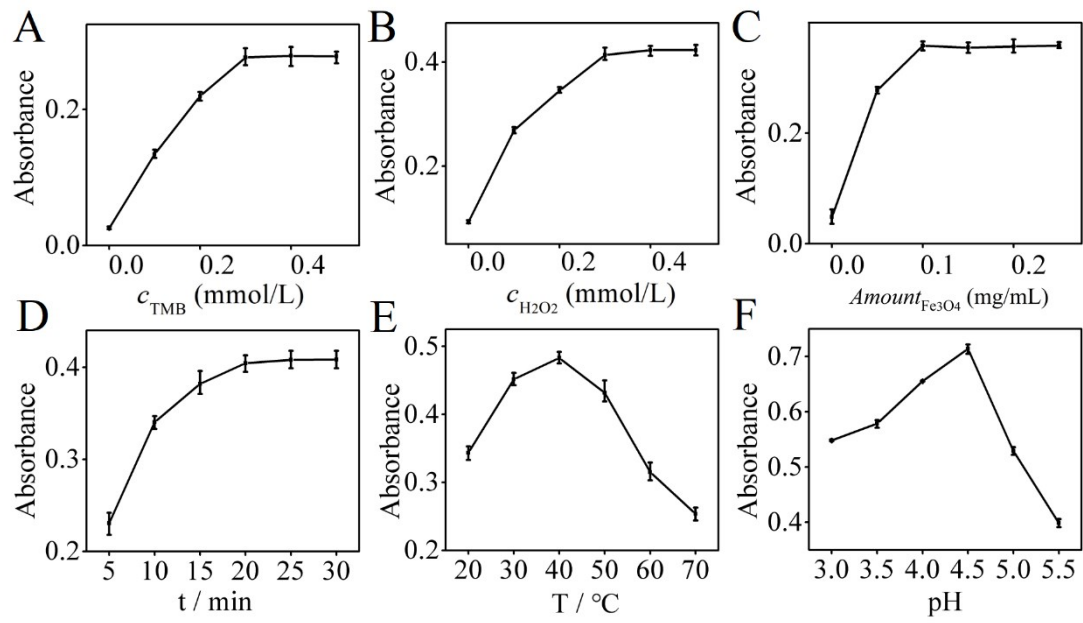

**Figure S5** The optimal conditions of the concentration of (A) TMB, (B)  $\text{H}_2\text{O}_2$ , and the amount of (C)  $\text{Fe}_3\text{O}_4$  NP, the reaction (D) temperature, (E) pH and (F) time.

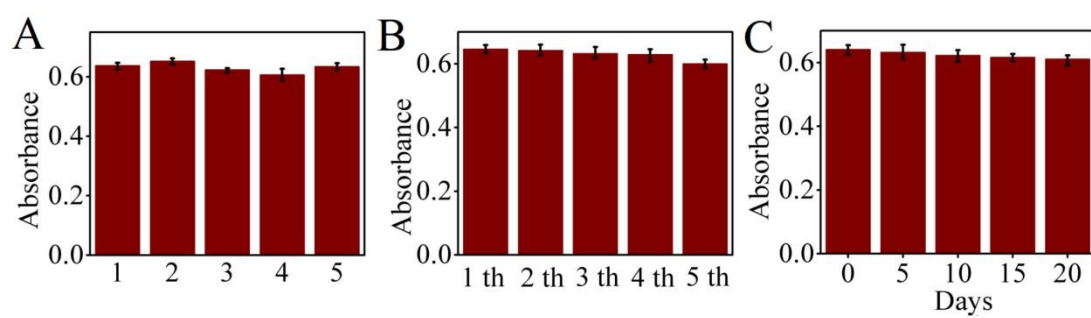

**Figure S6** Reproducibility (A), regeneration (B), and stability (C) of MIP-aptamer-Fe<sub>3</sub>O<sub>4</sub> NP.
